# Supplementary material
Source: Research Square preprint supplement (doi:10.21203/rs.3.rs-9321051/v1)
Supplement: Supplementary file 1 [file 0a5d9b92c2ea5c9f6b8364a0.docx]

**Supplementary Figure S1. Antitumor response to ARD in immunodeficient mice and pseudotime analysis of macrophage subsets.** (A) Growth curves of subcutaneous KPC tumors in nude mice under indicated treatments. (B) Body weight changes during treatment. (C) Representative images of excised tumors. Scale bar, 1 cm. (D) Pseudotime trajectories of macrophage subsets. (E) Representative genes with dynamic expression along pseudotime. (F) Heatmap of dynamically regulated genes across pseudotime clusters.

**Supplementary Figure S2. scMetabolism profiling of metabolic pathway activity across myeloid subpopulations.** Dot plot of relative metabolic pathway activity scores across myeloid subpopulations in vehicle- and ARD-treated tumors. Dot size and color indicate relative pathway activity.

**Supplementary Figure S3. scMetabolism analysis of metabolic pathway activity across T- and NK-cell subsets.** Dot plot of relative metabolic pathway activity across T- and NK-cell subsets in vehicle- and ARD-treated tumors. Dot color indicates pathway activity score, and dot size indicates the relative proportion of cells with detectable activity.

**Supplementary Figure S4. Multivariate validation of targeted tumor-tissue amino acid metabolomic profiling.** (A) OPLS-DA score plot of targeted amino acid-related metabolites in tumor tissues. (B) S-plot derived from the OPLS-DA model. (C) Permutation test supporting model robustness.


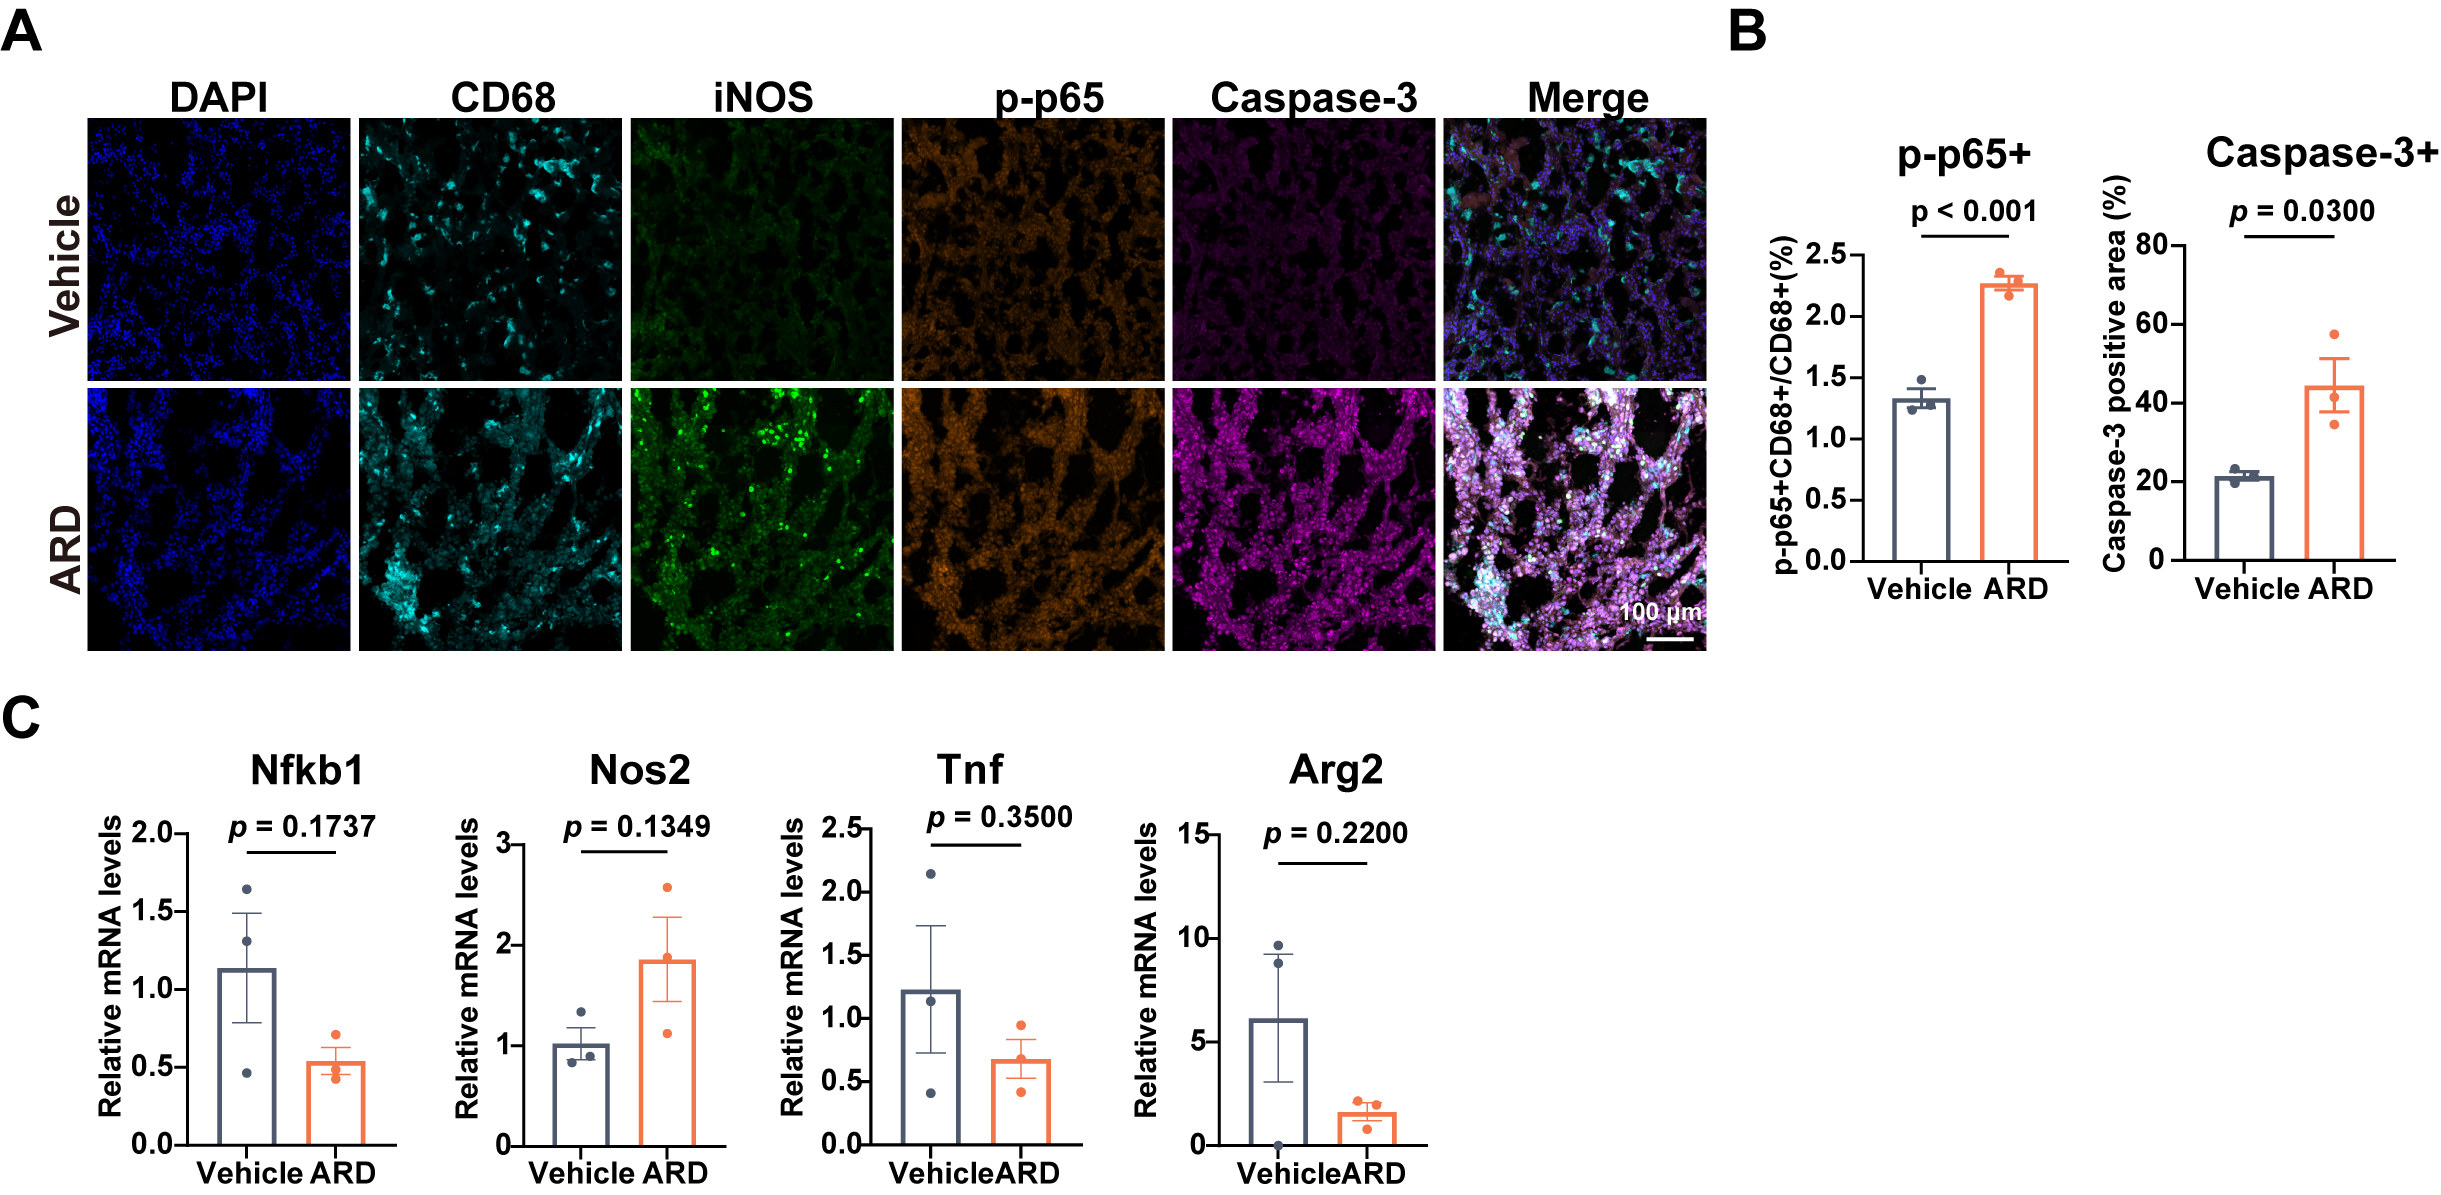


**Supplementary Figure S5. Additional validation of macrophage-associated signaling and tumor-cell apoptosis in orthotopic tumors.** (A) Representative multiplex immunofluorescence images of orthotopic tumor sections from vehicle- and ARD-treated mice. (B) Quantification of p-p65⁺CD68⁺ cells and caspase-3⁺ area. (C) qRT-PCR analysis of indicated genes in orthotopic tumors. Scale bar, 100 μm. Data are mean ± SEM; dots indicate biological replicates. P values are indicated.
