# Supplementary material
Source: Research Square preprint supplement (doi:10.21203/rs.3.rs-9321051/v1)
Supplement: Supplementary file 1 [file a3714cf82593920ca7781848.docx]

**Table 3. Classification of the 39 compounds identified in the ARD extract by chemical category**

| **Number** | | **Component name** | | **Observed RT**  **(min)** | | **Formula** | | **Neutral mass**  **(Da)** | | **Observed m/z** | | **Mass error**  **(ppm)** | | **Adducts** | | **Identifi-cation method** |
| --- | --- | --- | --- | --- | --- | --- | --- | --- | --- | --- | --- | --- | --- | --- | --- | --- |
| **1** | | Inosine | | 0.8 | | C10H12N4O5 | | 268.0808 | | 267.0752 | | 6.3 | | M-H | | UNIFI |
| **2** | | Mannoheptulose | | 0.81 | | C7H14O7 | | 210.074 | | 209.066 | | -3.1 | | M-H | | UNIFI |
| **3** | | beta-D-Ribofuranoside | | 0.82 | | C10H14N2O6 | | 258.0852 | | 259.0928 | | 1.2 | | M+H | | UNIFI |
| **4** | | Adenine | | 0.86 | | C5H5N5 | | 135.0545 | | 136.0625 | | 5.7 | | M+H | | UNIFI |
| **5** | | Uridine | | 1.08 | | C9H12N2O6 | | 244.0695 | | 243.0619 | | -1.7 | | M-H | | UNIFI |
| **6** | | 2-Acetamidopentanedioic acid | | 1.11 | | C7H11NO5 | | 189.0637 | | 188.0559 | | -3.1 | | M-H | | UNIFI |
| **7** | | 5-Hydroxymethylfurfural | | 1.12 | | C6H6O3 | | 126.0317 | | 125.0236 | | -6.3 | | M-H | | UNIFI |
| **8** | | Tyrosine | | 1.14 | | C9H11NO3 | | 181.0739 | | 180.0661 | | -2.8 | | M-H | | UNIFI |
| **9** | | Spantol | | 1.15 | | C10H13NO2 | | 179.0946 | | 180.1016 | | -1.5 | | M+H | | UNIFI |
| **10** | | Adenosine | | 1.17 | | C10H13N5O4 | | 267.0968 | | 268.104 | | 0 | | M+H | | UNIFI |
| **11** | | Guanosine | | 1.24 | | C10H13N5O5 | | 283.0917 | | 284.0996 | | 2.5 | | M+H | | UNIFI |
| **12** | | Leucinum | | 1.26 | | C6H13NO2 | | 131.0946 | | 130.0866 | | -6.1 | | M-H | | UNIFI |
| **13** | Guanine | | 1.36 | | C5H5N5O | | 151.0494 | | 152.0559 | | -5.2 | | M+H | | UNIFI | |
| **14** | Pedatisectine A | | 1.58 | | C11H10N6O | | 242.0916 | | 241.0828 | | -6.5 | | M-H,  M+HCOO | | UNIFI | |
| **15** | Phenylalanine | | 1.64 | | C9H11NO2 | | 165.079 | | 164.0713 | | -2.5 | | M-H | | UNIFI | |
| **16** | Protocatechuic acid 3-glucoside | | 1.72 | | C13H16O9 | | 316.0794 | | 315.0724 | | 0.9 | | M-H | | UNIFI | |
| **17** | Protocatechuic Acid | | 2.02 | | C7H6O4 | | 154.02661 | | 153.0186 | | -4.7 | | M-H | | UNIFI | |
| **18** | Neoschaftoside | | 2.88 | | C26H28O14 | | 564.1479 | | 565.1564 | | 2.1 | | M+H | | UNIFI | |
| **19** | Baicalin | | 4.14 | | C21H18O11 | | 446.0849 | | 447.0932 | | 2.2 | | M+H | | UNIFI | |
| **20** | Apigenin | | 6.11 | | C15H10O5 | | 270.0528 | | 271.06 | | -0.2 | | M+H | | UNIFI | |
| **21** | Baicalein | | 6.35 | | C15H10O5 | | 270.0528 | | 271.0598 | | -1 | | M+H | | UNIFI | |
| **22** | Wogonin | | 8.39 | | C16H12O5 | | 284.0685 | | 285.076 | | -1 | | M+H | | GNSP | |
| **23** | Negletein | | 8.91 | | C16H12O5 | | 284.0685 | | 285.076 | | -1 | | M+H | | GNSP | |
| **24** | C18H34NO | | 11.17 | | C18H34NO | | 279.2562 | | 280.262 | | -7.1 | | M+H | | Masslynx | |
| **25** | Phytosphingosine | | 11.67 | | C18H39NO3 | | 317.293 | | 318.3025 | | 5.3 | | M+H | | GNSP | |
| **26** | C33H45NO4/ C28H45N3O6 | | 14.34 | |  | |  | | 520.338 | |  | | M+H | | Masslynx | |
| **27** | C26H45N3O6/ C33H41N3O | | 15.42 | |  | |  | | 496.3357 | |  | | M+H | | Masslynx | |
| **28** | N-Hexadecanoic acid | | 15.45 | | C16H32O2 | | 256.2402 | | 279.2318 | | 8.5 | | M+Na | | UNIFI | |
| **29** | C33H47NO4/ C26H51NO9 | | 16.42 | |  | |  | | 522.3612 | |  | | M+H | | Masslynx | |
| **30** | (Z,Z,Z)-9,12,15-Octadecatrienoic acid | | 21.74 | | C18H30O2 | | 278.2246 | | 277.217 | | -1 | | M-H | | UNIFI | |
| **31** | 9-Hexadecenoic acid | | 22.77 | | C16H30O2 | | 254.2246 | | 253.2174 | | 0.2 | | M-H | | UNIFI | |
| **32** | Pentadecanoic acid | | 23.84 | | C15H30O2 | | 242.2246 | | 241.2173 | | 0 | | M-H | | UNIFI | |
| **33** | Linoelaidic acid | | 24.06 | | C18H32O2 | | 280.2402 | | 279.2328 | | -0.5 | | M-H | | UNIFI | |
| **34** | 12-Hydroxystearic acid | | 25.36 | | C18H36O3 | | 300.2664 | | 299.2564 | | 7.3 | | M-H | | UNIFI | |
| **35** | N-Hexadecanoic acid | | 25.92 | | C16H32O2 | | 256.2402 | | 255.233 | | 0.2 | | M-H | | UNIFI | |
| **36** | Oleic acid | | 26.76 | | C18H34O2 | | 282.2559 | | 281.2488 | | 0.6 | | M-H | | UNIFI | |
| **37** | Stearic acid | | 29.75 | | C18H36O2 | | 284.2715 | | 283.2646 | | 1.1 | | M-H | | UNIFI | |
| **38** | Soya-cerebroside I | | 32.32 | | C40H75NO9 | | 713.5442 | | 714.5516 | | 0.2 | | M+H, M+K, M+Na | | UNIFI | |
| **39** | Soya-cerebroside II | | 32.52 | | C40H75NO9 | | 713.5442 | | 714.5515 | | 0.1 | | M+H, M+K, M+Na | | UNIFI | |

**Table 4. Overview of absorbed metabolites detected in ARD-containing serum**

| **Number** | **Component name** | **Formula** | **Composite Score** | **Observed m/z** | **Observed RT** | **Mass error (ppm)** |
| --- | --- | --- | --- | --- | --- | --- |
| 1 | cis-8,11,14-Eicosatrienoic acid | C20H34O2 | 4 | 305.2485 | 557.3 | 0.2 |
| 2 | cis-11.14-Eicosadienoic acid | C20H36O2 | 3.99 | 307.2643 | 573.1 | 0.1 |
| 3 | cis-9-Palmitoleic acid | C16H30O2 | 3.99 | 253.2172 | 547.2 | 0.2 |
| 4 | Myristic acid | C14H28O2 | 3.99 | 227.2016 | 542.8 | 0.3 |
| 5 | trans-Vaccenic acid | C18H34O2 | 3.99 | 281.2484 | 569.6 | 0.6 |
| 6 | 10-Undecenoic acid | C11H20O2 | 3.98 | 183.139 | 472.5 | 0 |
| 7 | 13(S)-HODE | C18H32O3 | 3.98 | 295.2278 | 483.8 | 0.1 |
| 8 | D-Mannoheptulose | C7H14O7 | 3.98 | 209.0666 | 44.2 | 0.1 |
| 9 | ethyl octanoate | C10H20O2 | 3.98 | 171.139 | 475.2 | 0 |
| 10 | L-Glutamine | C5H10N2O3 | 3.98 | 145.0619 | 43.6 | 0.4 |
| 11 | Linoleic acid | C18H32O2 | 3.98 | 279.2326 | 551.2 | 1.1 |
| 12 | Nonadecanoic acid | C19H38O2 | 3.98 | 297.2799 | 599.2 | 0.1 |

| 13 | Oleic acid | C18H34O2 | | 3.98 | 281.2484 | 569.6 | 0.6 |
| --- | --- | --- | --- | --- | --- | --- | --- |
| 14 | 2'-Hydroxy-5'-methylacetophenone | C9H10O2 | | 3.97 | 149.0608 | 383.8 | 0.2 |
| 15 | 4-Vinylphenol | C8H8O | | 3.97 | 119.0502 | 368.4 | 0.2 |
| 16 | 5,9-dimethyltetracyclo[11.2.1.01,10.04,9]hexadecane-5,14-dicarboxylic acid | C20H30O4 | | 3.97 | 333.2073 | 457.8 | 0.5 |
| 17 | Allocholic acid | C24H40O5 | | 3.97 | 407.28 | 434.6 | 0.7 |
| 18 | Capric acid | C10H20O2 | | 3.97 | 171.139 | 475.2 | 0 |
| 19 | Cholic acid | C24H40O5 | | 3.97 | 407.28 | 434.6 | 0.7 |
| 20 | Eicosapentaenoic acid | C20H30O2 | | 3.97 | 301.2172 | 529.5 | 0.3 |
| 21 | Heptadecanoic acid | C17H34O2 | | 3.97 | 269.2486 | 578.1 | 0.1 |
| 22 | (E)-5-(1,2,4a,5-tetramethyl-2,3,4,7,8,8a-hexahydronaphthalen-1-yl)-3-methyl-pent-2-enoic acid | C20H32O2 | | 3.96 | 303.2326 | 545.7 | 1 |
| 23 | Catechin | C15H14O6 | | 3.96 | 289.072 | 246.5 | 0.8 |
| 24 | Inosine | C10H12N4O5 | | 3.96 | 267.0734 | 97.7 | 0.2 |
| 25 | L-Arginine | | C6H14N4O2 | 3.96 | 173.1043 | 44.1 | 0.2 |
| 26 | Methyl pentadecanoate | | C16H32O2 | 3.96 | 255.2328 | 567.1 | 0.4 |
| 27 | Palmitic acid | | C16H32O2 | 3.96 | 255.2328 | 567.1 | 0.4 |
| 28 | Pinoresinol 4-O-β-D-glucopyranoside | | C26H32O11 | 3.96 | 519.1879 | 283.2 | 1.5 |
| 29 | (±)-Equol | | C15H14O3 | 3.95 | 241.0872 | 359.7 | 0.9 |
| 30 | 12-Methyltridecanoic acid | | C14H28O2 | 3.95 | 227.2016 | 542.8 | 0.3 |
| 31 | 5-Hydroxymethylfurfural | | C6H6O3 | 3.95 | 127.0386 | 95.6 | 2.8 |
| 32 | Guanosine | | C10H13N5O5 | 3.95 | 284.0982 | 100 | 2.8 |
| 33 | Stearic acid | | C18H36O2 | 3.95 | 283.2642 | 590 | 0.3 |
| 34 | 2-Hydroxydecanoic-acid | | C10H20O3 | 3.94 | 187.1339 | 438.9 | 0.1 |
| 35 | 3,4-Dimethylbenzoic acid | | C9H10O2 | 3.94 | 149.0608 | 383.8 | 0.2 |
| 36 | Acanthoside B | | C28H36O13 | 3.94 | 579.2092 | 278.5 | 1.5 |
| 37 | Adenine | | C5H5N5 | 3.93 | 136.0613 | 74.1 | 3.5 |
| 38 | Enterolactone | | C18H18O4 | 3.93 | 297.1134 | 356.9 | 0.6 |
| 39 | 1-[2,4-dihydroxy-6-[(2S,3R,4S,5S,6R)-3,4,5-trihydroxy-6-(hydroxymethyl)tetrahydropyran-2-yl]oxy-phenyl]ethenone | | C14H18O9 | 3.91 | 329.0883 | 251.2 | 1.6 |
| 40 | 3-(5-hydroxy-2,2,7,8-tetramethyl-6-oxo-7,8-dihydropyrano[3,2-g]chromen-10-yl)hexanoic acid  （Isoapetalic acid） | | C22H28O6 | 3.91 | 387.1811 | 497.6 | 0.5 |
| 41 | Protocatechuic Acid | | C7H6O4 | 3.91 | 153.0194 | 208 | 0.8 |
| 42 | D-Glutamine | | C5H10N2O3 | 3.91 | 147.0759 | 46.6 | 3.4 |
| 43 | Galactaric acid | | C6H10O8 | 3.91 | 209.03 | 67.2 | 1.2 |
| 44 | 2-[4-[3-(4-hydroxy-3-methoxy-phenyl)-1,3,3a,4,6,6a-hexahydrofuro[3,4-c]furan-6-yl]-2-methoxy-phenoxy]-6-(hydroxymethyl)tetrahydropyran-3,4,5-triol | | C26H32O11 | 3.9 | 519.1879 | 283.2 | 1.5 |
| 45 | Guanine | | C5H5N5O | 3.9 | 152.0563 | 73.4 | 2.7 |
| 46 | N-Acetylglutamic acid | | C7H11NO5 | 3.9 | 188.0565 | 75.3 | 0.5 |
| 47 | Vicenin 2 | | C27H30O15 | 3.9 | 593.1521 | 267.9 | 1.5 |
| 48 | (10E,12E)-9-hydroxyoctadeca-10,12-dienoic acid | | C18H32O3 | 3.89 | 295.2278 | 483.8 | 0.1 |
| 49 | Androsin | | C15H20O8 | 3.89 | 327.109 | 243.7 | 1.4 |
| 50 | Aurantiamide acetate | | C27H28N2O4 | 3.89 | 445.2101 | 418.5 | 4.8 |
| 51 | Uridine | | C9H12N2O6 | 3.89 | 243.0622 | 71.9 | 0.1 |
| 52 | Vidarabine | | C10H13N5O4 | 3.89 | 266.0897 | 188.1 | 0.8 |
| 53 | Hyocholic acid | | C24H40O5 | 3.88 | 407.28 | 434.6 | 0.7 |
| 54 | Tyrosine | | C9H11NO3 | 3.88 | 180.0666 | 54.3 | 0.2 |
| 55 | 17-ODYA | | C18H32O2 | 3.87 | 279.2326 | 551.2 | 1.1 |
| 56 | 2,5-Dimethylphenol | | C8H10O | 3.87 | 121.0663 | 387.6 | 3.4 |
| 57 | Violanthin | | C27H30O14 | 3.87 | 577.1576 | 290.2 | 2.3 |
| 58 | Cytosine | | C4H5N3O | 3.86 | 112.0502 | 48.5 | 3.4 |
| 59 | Procyanidin B2 | | C30H26O12 | 3.86 | 579.1475 | 249.5 | 3.9 |
| 60 | Rhamnose | | C6H12O5 | 3.86 | 187.0572 | 46.1 | 3.2 |
| 61 | (2Z,6E,10E)-12-hydroxy-6,10-dimethyl-2-(4-methylpent-3-enyl)dodeca-2,6,10-trienoic acid | | C20H32O3 | 3.84 | 319.2281 | 473.5 | 0.8 |
| 62 | 5-[(Z)-5-hydroxy-3-methyl-pent-3-enyl]-1,4a-dimethyl-6-methylene-decalin-1-carboxylic acid | | C20H32O3 | 3.84 | 319.2281 | 473.5 | 0.8 |
| 63 | L-Allothreonine | | C4H9NO3 | 3.84 | 120.0651 | 46.7 | 3.7 |
| 64 | N-[2-(4-hydroxyphenyl)ethyl]acetamide | | C10H13NO2 | 3.84 | 180.1014 | 248.7 | 3.1 |
| 65 | (2E,6E,10E)-12-hydroxy-6,10-dimethyl-2-(4-methylpent-3-enyl)dodeca-2,6,10-trienoic acid | | C20H32O3 | 3.83 | 319.2281 | 473.5 | 0.8 |
| 66 | (5S,9R)-14-(hydroxymethyl)-5,9-dimethyl-tetracyclo[11.2.1.01,10.04,9]hexadecane-5-carboxylic acid | | C20H32O3 | 3.83 | 319.2281 | 473.5 | 0.8 |
| 67 | 14-(hydroxymethyl)-5,9-dimethyl-tetracyclo[11.2.1.01,10.04,9]hexadecane-5-carboxylic acid | | C20H32O3 | 3.83 | 319.2281 | 473.5 | 0.8 |
| 68 | 3,5-Di-tert-butylphenol | | C14H22O | 3.83 | 205.1597 | 497.5 | 0.3 |
| 69 | 3-Hydroxydodecanoic acid | | C12H24O3 | 3.82 | 215.1653 | 463.3 | 0.2 |
| 70 | 1-Deoxymannojirimycin | | C6H13NO4 | 3.81 | 146.0807 | 717.5 | 3.1 |
| 71 | Pinoresinol | | C20H22O6 | 3.8 | 357.1345 | 324.5 | 0.4 |
| 72 | 2,3-Dimethylphenol | | C8H10O | 3.79 | 121.0663 | 387.6 | 3.4 |
| 73 | 3-Ethylphenol | | C8H10O | 3.77 | 121.0663 | 387.6 | 3.4 |
| 74 | 3'-O-Methyladenosine | | C11H15N5O4 | 3.77 | 282.1224 | 206.1 | 9.4 |
| 75 | 4-Ethylphenol | | C8H10O | 3.77 | 121.0663 | 387.6 | 3.4 |
| 76 | 5,7-dihydroxy-2-(4-hydroxyphenyl)-6,8-bis[3,4,5-trihydroxy-6-(hydroxymethyl)tetrahydropyran-2-yl]chromen-4-one | | C27H30O15 | 3.77 | 593.1521 | 267.9 | 1.5 |
| 77 | 5,6-dihydroxy-7-isopropyl-1,1-dimethyl-2,3,4,9,10,10a-hexahydrophenanthrene-4a-carboxylic acid | | C20H28O4 | 3.75 | 331.1915 | 470.3 | 0.2 |
| 78 | 7-hydroxy-3-phenyl-chromen-4-one | | C15H10O3 | 3.75 | 237.0557 | 421.1 | 0.1 |
| 79 | (1R,3R,4R,6S,8S,10R,13R,14R)-5,5,14-trimethyl-9-methylene-tetracyclo[11.2.1.01,10.04,8]hexadecane-3,4,6,14-tetrol | | C20H32O4 | 3.74 | 335.223 | 394.2 | 0.6 |
| 80 | Retinoic acid | | C20H28O2 | 3.64 | 301.2151 | 474.9 | 3.8 |
| 81 | 9-cis-Retinoic acid | | C20H28O2 | 3.63 | 301.2151 | 474.9 | 3.8 |
| 82 | Biopterin | | C9H11N5O3 | 3.6 | 220.0809 | 64.1 | 8.8 |
| 83 | 4-hydroxy-4-[(E)-3-hydroxybut-1-enyl]-3,5,5-trimethyl-cyclohex-2-en-1-one | | C13H20O3 | 3.52 | 223.1361 | 235.5 | 9.6 |
| 84 | (5S,9R)-14-(hydroxymethyl)-5,9-dimethyl-tetracyclo[11.2.1.01,10.04,9]hexadec-14-ene-5-carboxylic acid | | C20H30O3 | 2.75 | 317.2122 | 475.7 | 0 |
| 85 | [(2R,3S,4S,5R,6S)-3,4,5-trihydroxy-6-(4-hydroxyphenoxy)oxan-2-yl]methyl (E)-3-(3,4-dihydroxyphenyl)prop-2-enoate | | C21H22O10 | 2.75 | 433.1138 | 348.3 | 0.2 |
| 86 | 13-HOTrE | | C18H30O3 | 2.75 | 293.2122 | 484.1 | 0.1 |
| 87 | 2-tert-Butyl-4-methoxyphenol | | C11H16O2 | 2.75 | 179.1078 | 369.1 | 0.2 |
| 88 | 3-hydroxy-hexadecanoic_acid | | C16H32O3 | 2.75 | 271.2279 | 533.4 | 0.2 |
| 89 | 5-hexyltetrahydrofuran-2-one | | C10H18O2 | 2.75 | 169.1234 | 455 | 0.2 |
| 90 | Bornyl ferulate | | C20H26O4 | 2.75 | 329.1758 | 436.4 | 0.1 |
| 91 | Chromomoric acid B | | C18H28O3 | 2.75 | 291.1967 | 530.8 | 0.2 |
| 92 | cis-7-Hexadecenoic acid | | C16H30O2 | 2.75 | 253.2173 | 561.6 | 0.1 |
| 93 | INDOLEACETALDEHYDE | | C10H9NO | 2.73 | 158.0611 | 206.5 | 0.4 |
| 94 | Protocatechualdehyde | | C7H6O3 | 2.73 | 137.0245 | 236.6 | 1 |
| 95 | (2R,3S,4S,5R,6R)-5-[(2S,3R,4R)-3,4-dihydroxy-4-(hydroxymethyl)oxolan-2-yl]oxy-2-(hydroxymethyl)-6-(2-phenylethoxy)oxane-3,4-diol | | C19H28O10 | 2.72 | 434.2009 | 280 | 1.1 |
| 96 | 3'-hydroxygenkwanin | | C16H12O6 | 2.72 | 301.0695 | 360.9 | 1.6 |
| 97 | batatasin III | | C15H16O3 | 2.72 | 243.1028 | 377.8 | 0.2 |
| 98 | oxacyclohexadecan-2-one | | C15H28O2 | 2.72 | 263.1996 | 448 | 1.5 |
| 99 | Phellodendrine | | C20H24NO4 | 2.72 | 342.1692 | 241.2 | 1.6 |
| 100 | Syringaresinol | | C22H26O8 | 2.72 | 417.1558 | 314.4 | 0.7 |
| 101 | 6,7-dimethoxy-2,2-dimethyl-2h-1-benzopyran | | C13H16O3 | 2.7 | 243.1007 | 315 | 2.7 |
| 102 | Dipropyl phthalate | | C14H18O4 | 2.7 | 249.1133 | 354.6 | 0.5 |
| 103 | Pyridine | | C5H5N | 2.7 | 80.0492 | 669.8 | 3.1 |
| 104 | Suberosin | | C15H16O3 | 2.7 | 245.1163 | 377.7 | 3.3 |
| 105 | Vasicinone | | C11H10N2O2 | 2.7 | 203.081 | 206.1 | 2.6 |
| 106 | Calealactone B | | C21H26O9 | 2.69 | 421.1503 | 334.8 | 0.1 |
| 107 | Coumestrol | | C15H8O5 | 2.69 | 267.0291 | 50.3 | 2.9 |
| 108 | Isoliquiritin | | C21H22O9 | 2.69 | 441.1143 | 315.4 | 3.9 |
| 109 | Panaquinquecol_1 | | C18H28O3 | 2.69 | 293.2101 | 404 | 3.5 |
| 110 | Phytocassane_A | | C20H28O3 | 2.69 | 317.2099 | 439.5 | 3.8 |
| 111 | Prexanthoperol | | C20H26O3 | 2.69 | 315.1944 | 433.4 | 3.4 |
| 112 | Taxodone | | C20H28O3 | 2.69 | 317.21 | 461.8 | 3.7 |
| 113 | 2-Phenylethyl 6-O-(6-deoxy-alpha-L-mannopyranosyl)-beta-D-glucopyranoside | | C20H30O10 | 2.68 | 448.2165 | 287 | 3.3 |
| 114 | alpha-licanic_acid | | C18H28O3 | 2.68 | 293.2101 | 422.5 | 3.5 |
| 115 | Daphnoretin | | C19H12O7 | 2.68 | 351.0525 | 374.5 | 4.2 |
| 116 | Eupatilin | | C18H16O7 | 2.68 | 343.0854 | 390 | 4.3 |
| 117 | PGA1 | | C20H32O4 | 2.68 | 337.2363 | 400.6 | 3.1 |
| 118 | 9(10)-Epoxy-12Z-octadecenoic acid | | C18H32O3 | 2.66 | 297.2414 | 456.8 | 3.4 |
| 119 | Glabrol | | C25H28O4 | 2.66 | 393.2121 | 207.1 | 5.4 |
| 120 | (12Z,15Z)-9,10,11-Trihydroxyoctadeca-12,15-dienoic acid | | C18H32O5 | 2.65 | 327.2178 | 404.3 | 0.2 |
| 121 | 6-Methoxy-[2'',3'':7,8]furanoflavanone | | C18H14O4 | 2.65 | 295.0949 | 86.4 | 5.3 |
| 122 | Lathyrol | | C20H30O4 | 2.65 | 335.2206 | 382.7 | 3.2 |
| 123 | Atractylenolide I | | C15H18O2 | 2.64 | 231.1371 | 387.3 | 3.4 |
| 124 | Praeroside III | | C20H24O10 | 2.64 | 423.1298 | 347.6 | 0.2 |
| 125 | Cyclo(alanylleucyl) | | C9H16N2O2 | 2.63 | 185.1277 | 207 | 4.1 |
| 126 | Bavachin | | C20H20O4 | 2.62 | 347.1227 | 259.6 | 7.7 |
| 127 | Corymbosin | | C19H18O7 | 2.61 | 357.101 | 431.2 | 8.6 |
| 128 | Phytocassane_C | | C20H30O3 | 2.61 | 319.2257 | 419.4 | 3.6 |
| 129 | 2-[2-(3,4-dihydroxyphenyl)ethoxy]-6-(hydroxymethyl)oxane-3,4,5-triol | | C14H20O8 | 2.6 | 334.1491 | 208 | 2.7 |
| 130 | gomisin A | | C23H28O7 | 2.6 | 417.1862 | 211 | 9.1 |
| 131 | (3E)-4-(1,2,4-Trihydroxy-2,6,6-trimethylcyclohexyl)but-3-en-2-yl hexopyranoside | | C19H34O9 | 2.58 | 405.2131 | 263.9 | 0.1 |
| 132 | ginkgolide B | | C20H24O10 | 2.58 | 423.1298 | 377.2 | 0.2 |
| 133 | DIHYDROTANSHINONE I | | C18H14O3 | 2.57 | 277.0864 | 101.4 | 2.1 |
| 134 | forskolin | | C22H34O7 | 2.55 | 433.2282 | 221.3 | 12 |
| 135 | Ginsenoside Rg1 | | C42H72O14 | 2.54 | 859.5071 | 329.5 | 4.2 |
| 136 | Cryptotanshinone | | C19H20O3 | 2.53 | 295.1316 | 452.9 | 8 |
| 137 | 14-Deoxy-11,12-didehydroandrographolide | | C20H28O4 | 2.52 | 331.1865 | 467.2 | 13.5 |
| 138 | Anthraflavic_acid | | C21H22O12 | 2.51 | 465.1044 | 242.5 | 1.1 |
| 139 | Germbudine | | C37H59NO12 | 2.51 | 710.4012 | 332.6 | 13.8 |
| 140 | Anacardic acid diene | | C22H32O3 | 2.49 | 343.2275 | 487.6 | 1.2 |
| 141 | Quinacrine | | C23H30ClN3O | 2.49 | 400.2167 | 272.7 | 4.2 |
| 142 | ent-Gallocatechin_4'-methyl_ether | | C16H16O7 | 2.48 | 321.0935 | 321.4 | 10.6 |
| 143 | Cadabicilone | | C15H22O3 | 2.46 | 251.1632 | 420.7 | 3.8 |
| 144 | kaempferol-7-O-deoxyhexoside | | C21H20O10 | 2.46 | 431.0881 | 251.2 | 11.4 |
| 145 | Salvianolic acid F | | C17H14O6 | 2.45 | 337.0607 | 61.9 | 2.2 |
| 146 | PSEUDO-ANISATIN | | C15H22O6 | 2.44 | 297.1344 | 310.8 | 0.1 |
| 147 | Dihydromyricetin | | C15H12O8 | 2.37 | 319.0497 | 246 | 10.7 |
| 148 | Licoricesaponin_E2 | | C42H60O16 | 2.34 | 821.4008 | 272 | 6.5 |
| 149 | Pogostone | | C12H16O4 | 2.33 | 223.0976 | 369.2 | 0.9 |
| 150 | Rasfonin | | C25H38O6 | 2.33 | 435.277 | 390.4 | 6.7 |
| 151 | 1-Nonen-3-ol | | C9H18O | 2.32 | 143.1426 | 1.8 | 3 |
| 152 | Cichorioside B | | C21H28O10 | 2.3 | 439.1611 | 336 | 0.1 |
| 153 | Heterotropan | | C24H32O6 | 2.29 | 417.2248 | 214.7 | 5.7 |
| 154 | 8-Gingerol | | C19H30O4 | 2.28 | 321.2072 | 474.5 | 0.3 |
| 155 | GEDUNIN | | C28H34O7 | 2.28 | 483.2374 | 202.4 | 0.6 |
| 156 | Tulipinolide | | C17H22O4 | 2.27 | 289.1445 | 431 | 0 |
| 157 | Anthranoyllycoctonine | | C32H46N2O8 | 2.26 | 587.333 | 318.6 | 0.5 |
| 158 | Morellic acid | | C33H36O8 | 2.26 | 561.2494 | 208.7 | 2.6 |
| 159 | 3-(4-Hydroxy-5,7-dimethyl-3-methylene-2-oxo-3,3a,4,5,8,8a-hexahydro-2H-cyclohepta[b]furan-6-yl)propyl acetate | | C17H24O5 | 2.25 | 309.1731 | 207.9 | 11.1 |
| 160 | Stigmastane-3,6-dione | | C29H48O2 | 2.25 | 429.3715 | 657.5 | 3 |
| 161 | 2,4-dihydroxyheptadec-16-ynyl acetate | | C19H34O4 | 2.24 | 325.2383 | 502.4 | 0.5 |
| 162 | (3E)-4-(1-Hydroxy-2,6,6-trimethyl-4-oxocyclohex-2-en-1-yl)but-3-en-2-yl 6-O-pentopyranosylhexopyranoside | | C24H38O12 | 2.23 | 517.2282 | 288.6 | 1.7 |
| 163 | Corchoionoside_B | | C19H28O9 | 2.21 | 401.1787 | 272 | 4.7 |
| 164 | 5-[(2R,3S)-6-hydroxy-2-(4-hydroxyphenyl)-4-[(E)-2-(4-hydroxyphenyl)ethenyl]-2,3-dihydro-1-benzofuran-3-yl]benzene-1,3-diol | | C28H22O6 | 2.2 | 453.1983 | 251.3 | 4.3 |
| 165 | ROBUSTIC ACID | | C22H20O6 | 2.17 | 379.1167 | 233.6 | 5.4 |
| 166 | 7-(2,4-dihydroxyphenyl)-5-hydroxy-2,2-dimethyl-10-(3-methylbut-2-enyl)pyrano[3,2-g]chromen-6-one | | C25H24O6 | 2.13 | 421.1593 | 242.2 | 12.5 |
| 167 | Vinylphenol O-[L-Rhamnopyranosyl-(1-6)-.beta.-D-glucopyranoside | | C20H28O10 | 2.1 | 427.1651 | 246 | 9.6 |
| 168 | [(1S)-5-hydroxy-1-[(2S,3R,4S,5S,6R)-3,4,5-trihydroxy-6-(hydroxymethyl)oxan-2-yl]oxy-1,4a,5,7a-tetrahydrocyclopenta[c]pyran-7-yl]methyl benzoate | | C22H26O10 | 2.09 | 449.1498 | 506.2 | 10 |
| 169 | (1S,2S,3aR,4S,5S,6E,9R,11R,12E,13aS)-4,9,11-Triacetoxy-3a-hydroxy-2,5,8,8,12-pentamethyl-2,3,3a,4,5,8,9,10,11,13a-decahydro-1H-cyclopenta[12]annulen-1-yl benzoate | | C33H44O9 | 2.06 | 567.2881 | 220.9 | 12.2 |
| 170 | Veratramine | | C27H39NO2 | 2.05 | 410.3099 | 456.1 | 12 |
| 171 | 4-[4-(1,3-benzodioxol-5-yl)-2,3-dimethylbutyl]-2-methoxyphenol | | C20H24O4 | 2.04 | 346.1963 | 256.5 | 13.5 |
| 172 | Michellamine_B | | C46H48N2O8 | 2.02 | 757.3374 | 313 | 14.5 |
